# Supplementary material for: Heterointerface engineering of Rh/Pd metallene for hydrazine oxidation-assisted energy-saving hydrogen production
Source: Royal Society of Chemistry journal article supplement (doi:10.1039/d3ta00797a), 2023-01-01
Supplement: d3ta00797a1.pdf [file d3ta00797a1.pdf]

Electronic Supplementary Information for

**Heterointerface engineering of Rh/Pd metallene for hydrazine oxidation-assisted  
energy-saving hydrogen production**

Ziqiang Wang, Guanghui Yang, Pengjun Tian, Kai Deng, Hongjie Yu, You Xu, Xiaonian Li,

Hongjing Wang\* and Liang Wang\*

State Key Laboratory Breeding Base of Green-Chemical Synthesis Technology, College of Chemical  
Engineering, Zhejiang University of Technology, Hangzhou, 310014, P. R. China.

E-mails: [hjw@zjut.edu.cn](mailto:hjw@zjut.edu.cn); [wangliang@zjut.edu.cn](mailto:wangliang@zjut.edu.cn)

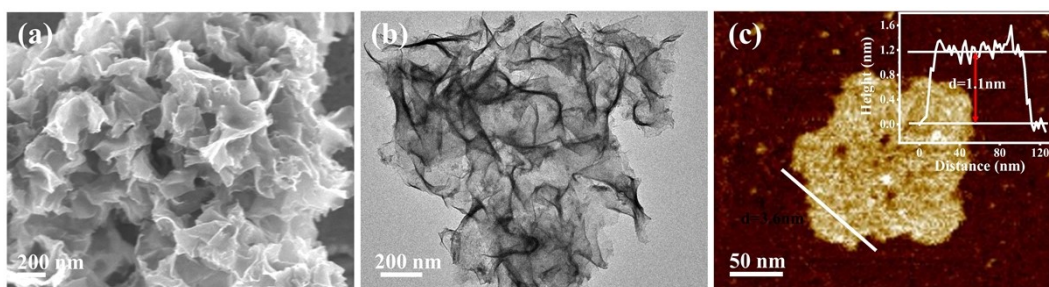

**Fig. S1** (a) SEM, (b)TEM and (c) AFM images of Pd metallene.

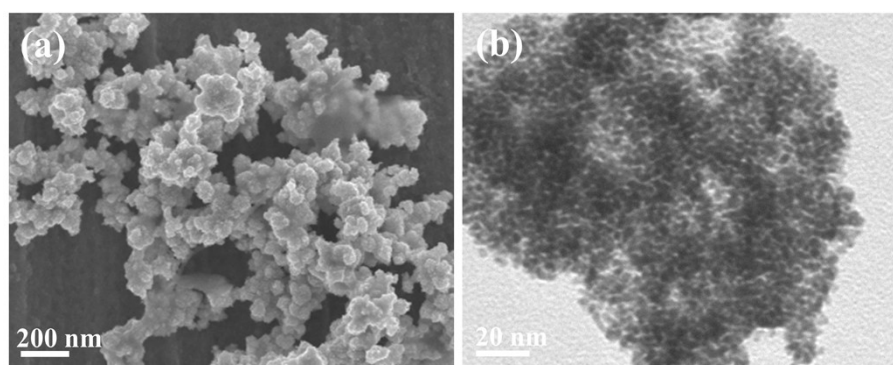

**Fig. S2** (a) SEM and (b) TEM images of Rh Nanoparticles.

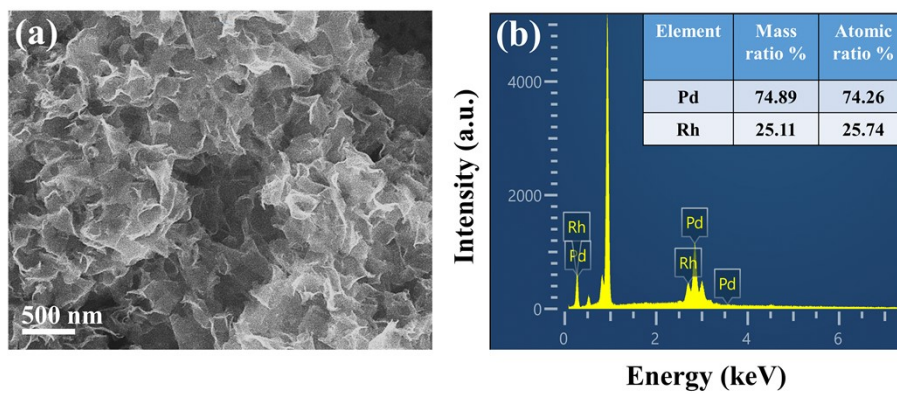

**Fig. S3** (a) SEM image and (b) corresponding EDX spectrum as well as element amounts of Rh/Pd metallene.

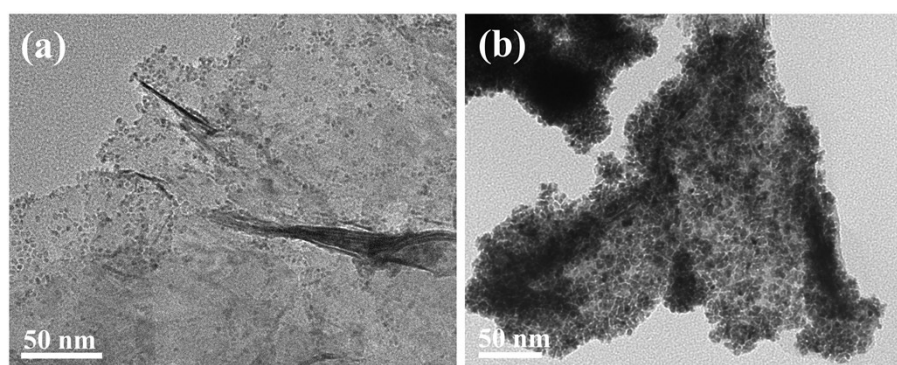

**Fig. S4** TEM images of the (a) L-Rh/Pd metallene and (b) H-Rh/Pd metallene

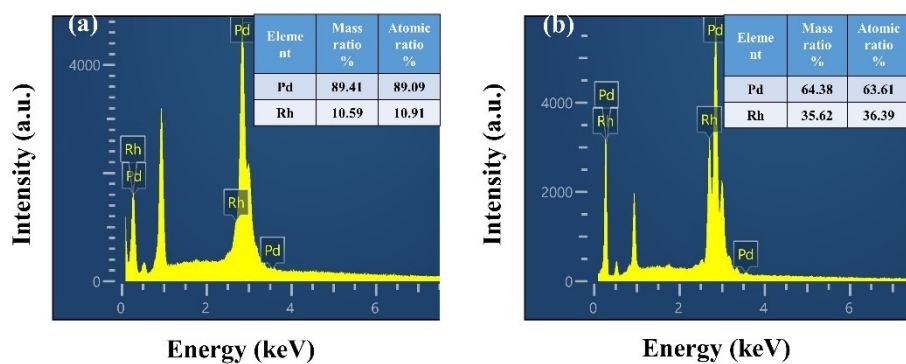

**Fig. S5** EDX spectra and element compositions of L-Rh/Pd metallene and H-Rh/Pd metallene.

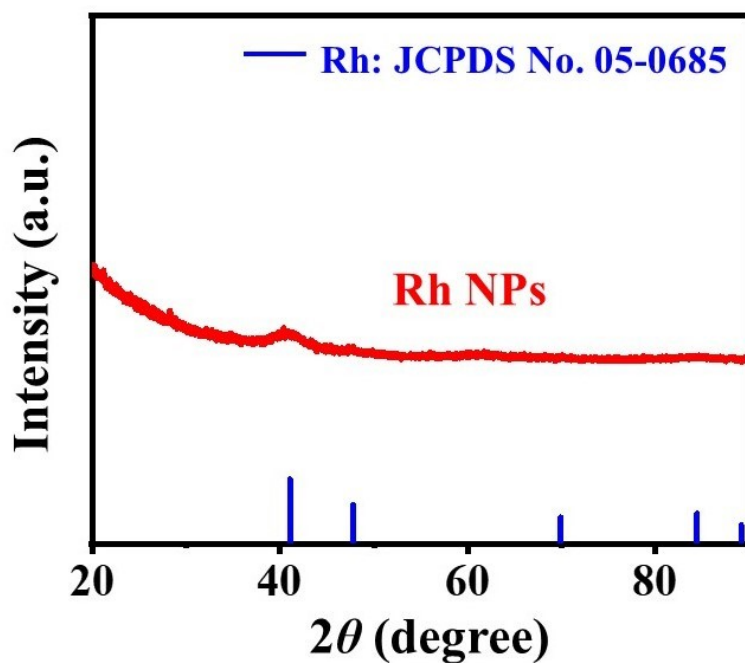

**Fig. S6** XRD pattern of Rh NPs

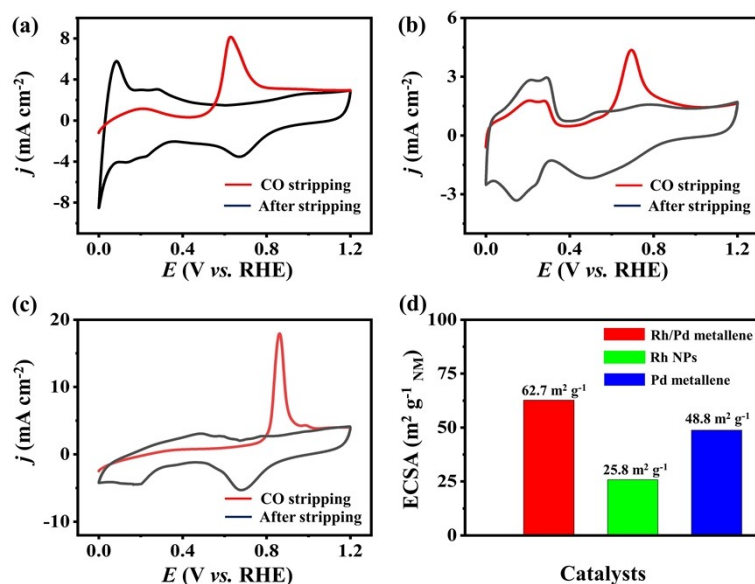

**Fig. S7** CO stripping measurements of (a) Rh/Pd metallene, (b) Rh nanoparticles, (c) Pd metallene in 1 M KOH at a scan rate of 20 mV s<sup>-1</sup> and (d) their corresponding ECSA values.

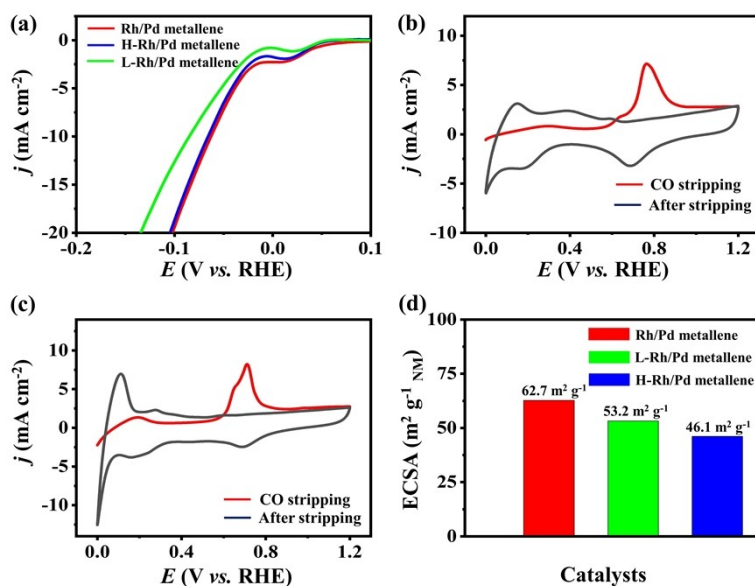

**Fig. S8** (a) LSV curves of samples for HER in 1 M KOH. CO stripping measurements of (b) L-Rh/Pd metallene and (c) H-Rh/Pd metallene in 1 M KOH at 20 mV s<sup>-1</sup> and (d) their corresponding ECSA values.

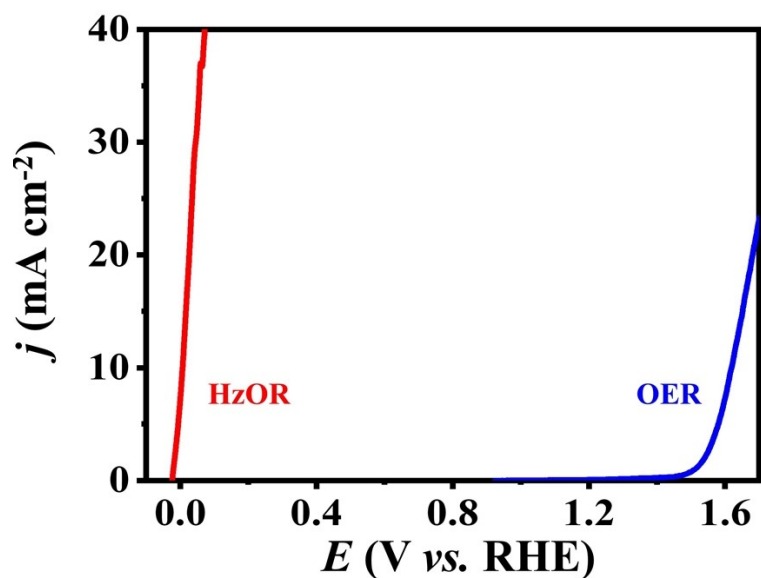

**Fig. S9** The LSV curves of Rh/Pd metallene for HzOR in 1.0 M KOH + 0.1 M N<sub>2</sub>H<sub>4</sub> and OER in 1.0 M KOH.

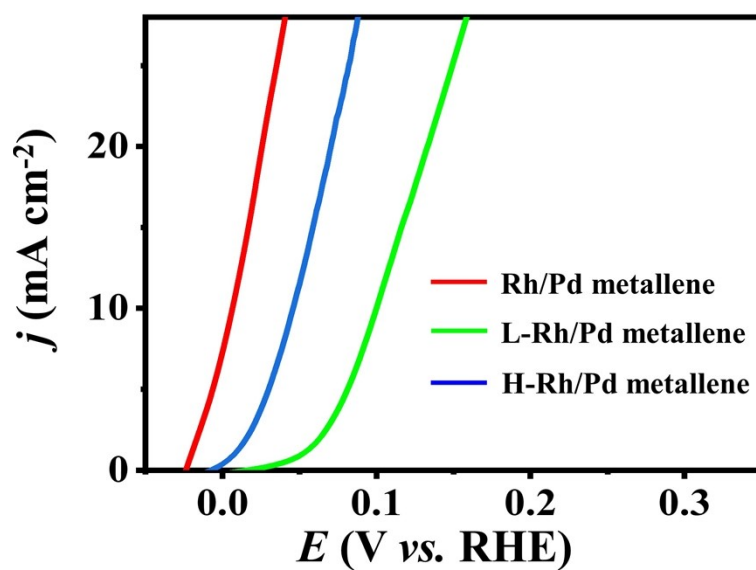

**Fig. S10** The LSV curves of Rh/Pd metallene, L-Rh/Pd metallene and H-Rh/Pd metallene for HzOR in 1.0 M KOH + 0.1 M N<sub>2</sub>H<sub>4</sub>.

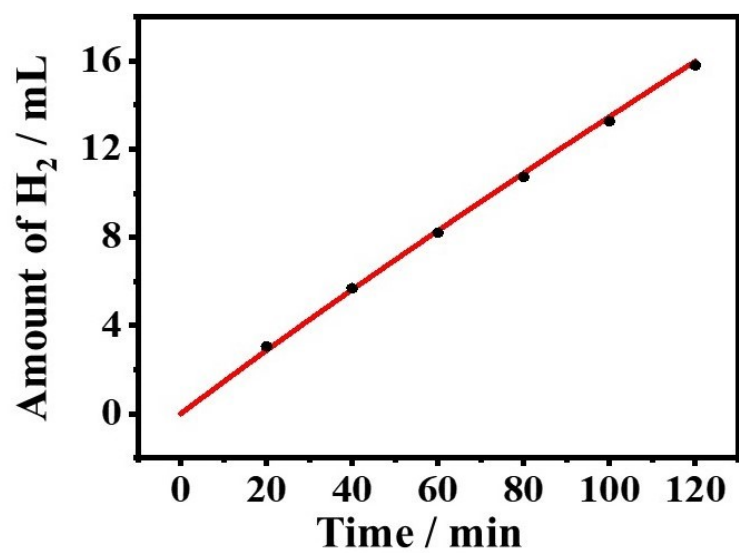

**Fig. S11** The relationship between the amounts of generated H<sub>2</sub> and theoretically calculated H<sub>2</sub> along with the increase of electrolysis time.

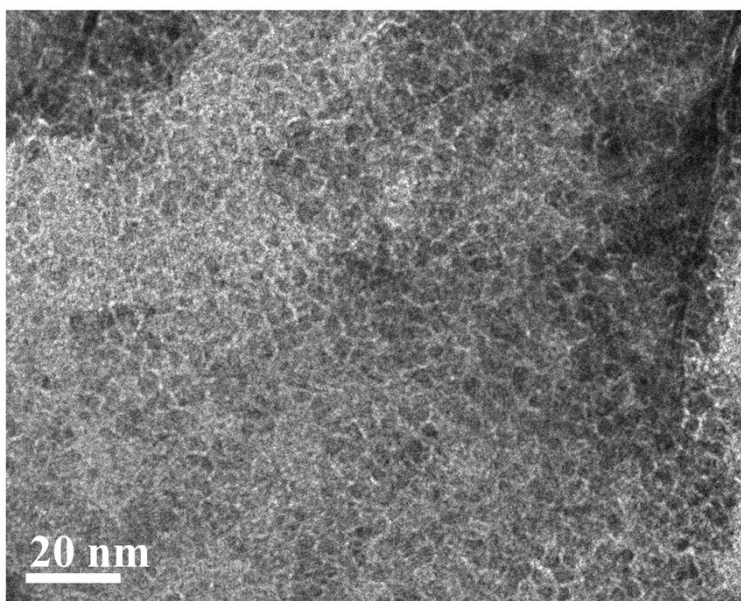

**Fig. S12** TEM image of Rh/Pd metallene after stability test.

**Table S1** The comparison of OHZS performance of Rh/Pd metallene with the representative reported catalyst.

| Catalyst                           | Condition                                       | Current Density              | Cell voltage   | Ref.             |
|------------------------------------|-------------------------------------------------|------------------------------|----------------|------------------|
| <b>Rh/Pd metallene</b>             | <b>1 M KOH/0.1 M N<sub>2</sub>H<sub>4</sub></b> | <b>10 mA cm<sup>-2</sup></b> | <b>0.050 V</b> | <b>This work</b> |
| l-Rh metallene                     | 1 M KOH/0.1 M N <sub>2</sub> H <sub>4</sub>     | 10 mA cm <sup>-2</sup>       | 0.028 V        | 1                |
| a-RhPb NFs                         | 1 M KOH/0.1 M N <sub>2</sub> H <sub>4</sub>     | 10 mA cm <sup>-2</sup>       | 0.095 V        | 2                |
| Rh <sub>2</sub> S <sub>3</sub> /NC | 1 M KOH/0.1 M N <sub>2</sub> H <sub>4</sub>     | 10 mA cm <sup>-2</sup>       | 0.108 V        | 3                |
| Ru-MPNC                            | 1 M KOH/0.5 M N <sub>2</sub> H <sub>4</sub>     | 50 mA cm <sup>-2</sup>       | 0.149 V        | 4                |
| Rh/RhOx                            | 1 M KOH/0.5 M N <sub>2</sub> H <sub>4</sub>     | 10 mA cm <sup>-2</sup>       | 0.068 V        | 5                |
| RuP <sub>2</sub> NPs               | 1 M KOH/0.5 M N <sub>2</sub> H <sub>4</sub>     | 10 mA cm <sup>-2</sup>       | 0.023 V        | 6                |
| CC@WO <sub>3</sub> /Ru SAs         | 1 M KOH/0.5 M N <sub>2</sub> H <sub>4</sub>     | 10 mA cm <sup>-2</sup>       | 0.025 V        | 7                |
| RhIr MNs                           | 1 M KOH/0.5 M N <sub>2</sub> H <sub>4</sub>     | 10 mA cm <sup>-2</sup>       | 0.130 V        | 8                |
| Rh NCs                             | 1 M KOH/1 M N <sub>2</sub> H <sub>4</sub>       | 10 mA cm <sup>-2</sup>       | 0.223 V        | 9                |



## References

1. K. Deng, Q. Mao, W. Wang, P. Wang, Z. Wang, Y. Xu, X. Li, H. Wang and L. Wang, *Appl. Catal., B*, 2022, **310**, 121338.
2. W. Tian, X. Zhang, Z. Wang, L. Cui, M. Li, Y. Xu, X. Li, L. Wang and H. Wang, *Chem. Eng. J.*, 2022, **440**, 135848.
3. C. Zhang, H. Liu, Y. Liu, X. Liu, Y. Mi, R. Guo, J. Sun, H. Bao, J. He, Y. Qiu, J. Ren, X. Yang, J. Luo and G. Hu, *Small Methods*, 2020, **4**, 2000208.
4. J. Wang, X. Guan, H. Li, S. Zeng, R. Li, Q. Yao, H. Chen, Y. Zheng and K. Qu, *Nano Energy*, 2022, **100**, 107467.
5. J. Yang, L. Xu, W. Zhu, M. Xie, F. Liao, T. Cheng, Z. Kang and M. Shao, *J. Mater. Chem. A*, 2022, **10**, 1891-1898.
6. Y. Li, J. Zhang, Y. Liu, Q. Qian, Z. Li, Y. Zhu and G. Zhang, *Sci. Adv.*, 2020, **6**, eabb4197.
7. J. Li, C. Zhang, C. Zhang, H. Ma, Y. Yang, Z. Guo, Y. Wang and H. Ma, *Chem. Eng. J.*, 2022, **430**, 132953.
8. M. Zhang, Z. Wang, Z. Duan, S. Wang, Y. Xu, X. Li, L. Wang and H. Wang, *J. Mater. Chem. A*, 2021, **9**, 18323-18328.
9. X. Huang, Y. Wang, Q. Zhu, K. Zhou, H. Zhi and J. Yang, *Inorg. Chem. Commun.*, 2021, **134**, 109023.
